# Supplementary material for: Prevalence of Low Ankle Brachial Index and Its Association With Pulse Pressure in an Elderly Chinese Population: A Cross-Sectional Study
Source: PubMed Central journal article supplement (PMC3798641; doi:10.2188/jea.je20110140), 2012-09-05
Supplement: je-22-454-s001.pdf [file je-22-454-s001.pdf]

**eTable 1.** Clinical Profile of Participants With or Without Stroke or Coronary Heart Disease

| Variable                 | With stroke or coronary heart diseases<br>(n=715) | Without stroke or coronary heart diseases<br>(n=2267) | P value |
|--------------------------|---------------------------------------------------|-------------------------------------------------------|---------|
| Age (years)              | 68.9± 5.9                                         | 67.9± 6.0                                             | 0.0002  |
| Height (cm)              | 158.20± 8.03                                      | 158.21± 8.36                                          | 0.9680  |
| Weight (cm)              | 64.71±11.14                                       | 63.03±11.27                                           | 0.0005  |
| BMI (kg/m <sup>2</sup> ) | 25.80± 3.71                                       | 25.15± 3.93                                           | 0.0001  |
| Waist (cm)               | 90.84±10.15                                       | 88.78±10.38                                           | <0.0001 |
| Hip (cm)                 | 98.52± 7.62                                       | 97.39± 7.53                                           | 0.0005  |
| SBP (mm Hg)              | 139.1±19.8                                        | 135.7±19.8                                            | <0.0001 |
| DBP (mm Hg)              | 79.5±10.7                                         | 79.3±10.2                                             | 0.5566  |
| Glucose (mmol/l)         | 5.53± 1.91                                        | 5.35± 1.80                                            | 0.0168  |
| TC (mmol/l)              | 5.11± 1.03                                        | 5.09± 0.94                                            | 0.5648  |
| TG (mmol/l)              | 1.66± 1.06                                        | 1.50± 1.09                                            | 0.0003  |
| LDL-C (mmol/l)           | 2.66± 0.73                                        | 2.67± 0.68                                            | 0.7383  |
| HDL-C (mmol/l)           | 1.30± 0.33                                        | 1.34± 0.31                                            | 0.0005  |
| Pulse pressure (mm Hg)   | 59.5±17.2                                         | 56.4±17.2                                             | <0.0001 |
| ABI                      | 1.04± 0.13                                        | 1.07± 0.11                                            | <0.0001 |
| Hypertension             | 530 (74.13)                                       | 1259 (55.54)                                          | <0.0001 |
| Diabetes                 | 195 (27.27)                                       | 371 (16.37)                                           | <0.0001 |
| Dyslipidemia             | 487 (68.11)                                       | 1375 (60.65)                                          | <0.0001 |
| Low ABI                  | 78 (10.91)                                        | 128 ( 5.65)                                           | <0.0001 |

Abbreviations: BMI: body mass index, SBP: systolic blood pressure, DBP: diastolic blood pressure, TC: total cholesterol, TG: triglycerides, LDL-C: low-density lipoprotein cholesterol, HDL-C: high-density lipoprotein cholesterol, ABI: ankle brachial index.

**eTable 2.** Distribution of Risk Factors for Low ABI by Sex and Age Group

| Variable         | Men        |            |           | <i>P</i> | Women      |            |           | <i>P</i> | Both        |            |           | <i>P</i> |
|------------------|------------|------------|-----------|----------|------------|------------|-----------|----------|-------------|------------|-----------|----------|
|                  | 60-69      | 70-79      | 80-       |          | 60-69      | 70-79      | 80-       |          | 60-69       | 70-79      | 80-       |          |
| Current smoking  | 376(70.68) | 180(60.61) | 25(58.14) | 0.0021   | 144(16.29) | 76(16.67)  | 14(25.93) | 0.2131   | 520(36.72)  | 256(34.0)  | 39(40.21) | 0.6345   |
| Current drinking | 256(48.12) | 110(37.04) | 11(25.58) | <0.0001  | 36(4.07)   | 26(5.70)   | 3(5.56)   | 0.2015   | 292(20.62)  | 136(18.06) | 14(14.43) | 0.0541   |
| Obesity          | 39(7.33)   | 33(11.11)  | 4(9.30)   | 0.1193   | 432(48.87) | 235(51.54) | 28(51.85) | 0.3517   | 471(33.26)  | 268(35.59) | 32(32.99) | 0.4493   |
| Hypertension     | 281(52.82) | 158(53.20) | 27(62.79) | 0.3972   | 462(52.26) | 298(65.35) | 33(61.11) | <0.0001  | 743(52.47)  | 456(60.56) | 60(61.86) | 0.0003   |
| Fasting glucose  |            |            |           |          |            |            |           |          |             |            |           |          |
| Normal           | 406(76.32) | 220(74.07) | 34(79.07) | 0.7999   | 647(73.19) | 331(72.59) | 35(64.81) | 0.3233   | 1053(74.36) | 551(73.17) | 69(71.13) | 0.3771   |
| IFG              | 52(9.77)   | 27(9.09)   | 2(4.65)   | 0.3633   | 90(10.18)  | 43(9.43)   | 9(16.67)  | 0.5842   | 142(10.03)  | 70(9.30)   | 11(11.34) | 0.8776   |
| DM               | 74(13.91)  | 50(16.84)  | 7(16.28)  | 0.2970   | 147(16.63) | 82(17.98)  | 10(18.52) | 0.4662   | 221(15.61)  | 132(17.53) | 17(17.53) | 0.2405   |
| Abnormal TC      | 177(33.27) | 87(29.29)  | 8(18.60)  | 0.0404   | 459(51.92) | 241(52.85) | 24(44.44) | 0.7297   | 636(44.92)  | 328(43.56) | 32(32.99) | 0.0776   |
| Abnormal TG      | 113(21.24) | 60(20.20)  | 4(9.30)   | 0.1625   | 323(36.54) | 129(28.29) | 19(35.19) | 0.0202   | 436(30.79)  | 189(25.1)  | 23(23.71) | 0.0041   |
| Abnormal LDL-C   | 57(10.71)  | 24(8.08)   | 5(11.63)  | 0.4656   | 156(17.65) | 79(17.32)  | 6(11.11)  | 0.4068   | 213(15.04)  | 103(13.68) | 11(11.34) | 0.2209   |
| Abnormal HDL-C   | 89(16.73)  | 68(22.90)  | 7(16.28)  | 0.1413   | 103(11.65) | 40(8.77)   | 12(22.22) | 0.8536   | 192(13.56)  | 108(14.34) | 19(19.59) | 0.1844   |
| Dyslipidemia     | 272(51.13) | 153(51.52) | 16(37.21) | 0.3159   | 600(67.87) | 296(64.91) | 37(68.52) | 0.4623   | 872(61.58)  | 449(59.63) | 53(54.64) | 0.1546   |

Abbreviations: IFG: impaired fasting glucose; DM: diabetes mellitus; TC: total cholesterol, TG: triglycerides, LDL-C: low-density lipoprotein cholesterol, HDL-C: high-density lipoprotein cholesterol.

P values were calculated using the Cochran–Armitage Trend Test.
